# Supplementary material
Source: publisher figshare collection journal article supplement (https://plos.figshare.com/articles/dataset/_/5693872)
Supplement: Supplementary file [file 1]

## A) PP65

| Peptide No. | Sequence         |
|-------------|------------------|
| 1           | MESRRRCPEMISVL   |
| 2           | GRRCPMISVLGPIS   |
| 3           | PEMISVLGPISGHVL  |
| 4           | SVLGPISGHVLKAVF  |
| 5           | PISGHVLKAVFSRGD  |
| 6           | HVLKAVFSRGDTPVL  |
| 7           | AVFSRGDTPVLPHET  |
| 8           | RGDTPVLPHETRLLQ  |
| 9           | PVLPHETRLLQTGIOH |
| 10          | HETRLLQTGIHVRVS  |
| 11          | LLQTGIHVRVSQPSL  |
| 12          | GIHVRVSQPSLILVS  |
| 13          | RVSQPSLILVSQYTP  |
| 14          | PSLILVSQYTPDSTP  |
| 15          | LVSQYTPDSTPCHRG  |
| 16          | YTPDSTPCHRGDNQL  |
| 17          | STPCHRGDNQLQVQOH |
| 18          | HRGDNLQVQHTYFT   |
| 19          | NQLQVQHTYFTGSEV  |
| 20          | VQHTYFTGSEVENVS  |
| 21          | YFTGSEVENVSVNVOH |
| 22          | SEVENVSVNVHNPTG  |
| 23          | NVSVNVHNPTGRSIC  |
| 24          | NVHNPTGRSICPSQE  |
| 25          | PTGRSICPSQEPMIS  |
| 26          | SICPSQEPMISYVYA  |
| 27          | SQEPMISYVYALPLK  |
| 28          | MSIYVYALPLKMLNI  |
| 29          | VYALPLKMLNIPSIN  |
| 30          | PLKMLNIPSINVHHY  |
| 31          | LNIPSINVHHYPSAA  |
| 32          | SINVHHYPSAAERKOH |
| 33          | HHYPSAAERKHRHLP  |
| 34          | SAAERKHRHLPVADA  |
| 35          | RKHRHLPVADAVIHA  |
| 36          | HLPVADAVIHASGKQ  |
| 37          | ADAVIHASGKQMWQA  |
| 38          | IHASGKQMWQARLTV  |
| 39          | GKQMWQARLTVSGLA  |
| 40          | WQARLTVSGLAWTRQ  |
| 41          | LTVSGLAWTRQQNQW  |
| 42          | GLAWTRQQNQWKEPD  |
| 43          | TRQQNQWKEPDVYYT  |
| 44          | NQVVKEPDVYYTSAFV |
| 45          | EPDVYYTSAFVFPTK  |
| 46          | YYTSAFVFPTKDVAL  |
| 47          | AFVFPTKDVALRHW   |
| 48          | PTKDVALRHWCAHE   |
| 49          | VALRHWCAHELVCS   |
| 50          | HWCAHELVCSMENT   |

|    |                  |
|----|------------------|
| 51 | AHELVCSMENTRATK  |
| 51 | AHELVCSMENTRATK  |
| 52 | VCSMENTRATKMQUI  |
| 53 | ENTRATKMQUIGDQY  |
| 54 | ATKMQUIGDQYVKVY  |
| 55 | QVIGDQYVKVYLESF  |
| 56 | DQYVKVYLESFCEVD  |
| 57 | KVYLESFCEVDPSGK  |
| 58 | ESFCEVDPSGKLFMOH |
| 59 | EDVPSGKLFMHVTLG  |
| 60 | SGKLFMHVTLGSDVE  |
| 61 | FMHVTLGSDVEEDLT  |
| 62 | TLGSDVEEDLTMTRN  |
| 63 | DVEEDLTMTRNPQPF  |
| 64 | DLTMTRNPQPFMRPOH |
| 65 | TRNPQPFMRPHERNG  |
| 66 | QPFMRPHERNGFTVL  |
| 67 | RPHERNGFTVLCPKN  |
| 68 | RNGFTVLCPKNMIK   |
| 69 | TVLCPKNMIKPGKI   |
| 70 | PKNMIKPGKISHIM   |
| 71 | IIKPGKISHIMLDVA  |
| 72 | GKISHIMLDVAFTSOH |
| 73 | HIMLDVAFTSHEHFG  |
| 74 | DVAFTSHEHFGLLCP  |
| 75 | TSHEHFGLLCPKSIP  |
| 76 | HFGLLCPKSIPGLSI  |
| 77 | LCPKSIPGLSISGNL  |
| 78 | SIPGLSISGNLLMNG  |
| 79 | LSISGNLLMNGQQIF  |
| 80 | GNLLMNGQQIFLEVQ  |
| 81 | MNGQQIFLEVQAIRE  |
| 82 | QIFLEVQAIRETVEL  |
| 83 | EVQAIRETVELRQYD  |
| 84 | IRETVELRQYDPVAA  |
| 85 | VELRQYDPVAALFFF  |
| 86 | QYDPVAALFFFDIDL  |
| 87 | VAALFFFDIDLLLR   |
| 88 | FFFDIDLLLRGPQY   |
| 89 | IDLLLRGPQYSEHP   |
| 90 | LQRPQYSEHPTFTS   |
| 91 | PQYSEHPTFTSQYRI  |
| 92 | EHPTFTSQYRIQGKL  |
| 93 | FTSQYRIQGKLEYROH |
| 94 | YRIQGKLEYRHTWDR  |
| 95 | GKLEYRHTWDRHDEG  |
| 96 | YRHTWDRHDEGAAQG  |
| 97 | WDRHDEGAAQGDDDV  |
| 98 | DEGAAQGDDDVWTSG  |
| 99 | AQGDDDVWTSGSDSD  |

|     |                  |
|-----|------------------|
| 100 | DDVWTSGSDSDEELV  |
| 101 | TSGSDSDEELVTTER  |
| 102 | DSDEELVTTERKTPR  |
| 103 | ELVTTERKTPRVTGG  |
| 104 | TERKTPRVTGGGAMA  |
| 105 | TPRVTGGGAMAGAST  |
| 106 | TGGGAMAGASTSAGR  |
| 107 | AMAGASTSAGRKRKS  |
| 108 | ASTSAGRKRKSASSA  |
| 109 | AGRKRKSASSATACT  |
| 110 | RKSASSATACTSGVM  |
| 111 | SSATACTSGVMTRGR  |
| 112 | ACTSGVMTRGRLKAE  |
| 113 | GVMTRGRLKAESTVA  |
| 114 | RGRLKAESTVAPEED  |
| 115 | KAESTVAPEEDTDED  |
| 116 | TVAPEEDTDESDNE   |
| 117 | EEDTDESDNEIHNP   |
| 118 | DESDNEIHNPVFT    |
| 119 | DNEIHNPVFTWPPW   |
| 120 | HNPVFTWPPWQAGI   |
| 121 | VFTWPPWQAGILARN  |
| 122 | PPWQAGILARNLVM   |
| 123 | AGILARNLVMVATV   |
| 124 | ARNLVMVATVQGN    |
| 125 | VPMVATVQGNLKYQ   |
| 126 | ATVQGNLKYQEFFW   |
| 127 | GQNLKYQEFFWDAND  |
| 128 | KYQEFFWDANDIYRI  |
| 129 | FFWDANDIYRIFAE   |
| 130 | ANDIYRIFAELEGVW  |
| 131 | YRIFAELEGVWQPA   |
| 132 | AELEGVWQPAQPKR   |
| 133 | GVWQPAQPKRRRHR   |
| 134 | PAAQPKRRRHRQOAL  |
| 135 | PKRRRHRQOALPGPC  |
| 136 | RHRQOALPGPCIAST  |
| 137 | OALPGPCIASTPKKOH |
| 138 | LPGPCIASTPKKHRG  |

## B) IE1

| Peptide No. | Sequence        |
|-------------|-----------------|
| 139         | MESSAKRKMDPDNPD |
| 140         | AKRKMDPDNPDEGPS |
| 141         | MDPDNPDEGPSSKVP |
| 142         | NPDEGPSSKVPRPET |
| 143         | GPSSKVPRPETPVTK |
| 144         | KVPRPETPVTKATTF |
| 145         | PETPVTKATTFLQTM |
| 146         | VTKATTFLQTMLRKE |
| 147         | TTFLQTMLRKEVNSQ |
| 148         | QTMLRKEVNSQLSLG |
| 149         | RKEVNSQLSLGDPLF |
| 150         | NSQLSLGDPLFPELA |
| 151         | SLGDPLFPELAEESL |
| 152         | PLFPELAEESLKTFE |
| 153         | ELAEESLKTFEQVTE |
| 154         | ESLKTFEQVTEDCNE |
| 155         | TFEQVTEDCNENPEK |
| 156         | VTEDCNENPEKDVLA |
| 157         | CNENPEKDVLAELVK |
| 158         | PEKDVLAELVKQIKV |
| 159         | VLAELVKQIKVRVDM |
| 160         | LVKQIKVRVDMVRHR |
| 161         | IKVRVDMVRHRIKEH |
| 162         | VDMVRHRIKEHMLKK |
| 163         | RHRIKEHMLKKYTQT |
| 164         | KEHMLKKYTQTEEF  |
| 165         | LKKYTQTEEFKGAF  |
| 166         | TQTEEFKGAFNMMG  |
| 167         | EKFTGAFNMMGGCLQ |
| 168         | GAFNMMGGCLQNALD |
| 169         | MMGGCLQNALDILDK |
| 170         | CLQNALDILDKVHEP |
| 171         | ALDILDKVHEPFEEM |
| 172         | LDKVHEPFEEMKCIG |
| 173         | HEPFEEMKCIGLTMQ |
| 174         | EEMKCIGLTMQSMYE |
| 175         | CIGLTMQSMYENYIV |
| 176         | TMQSMYENYIVPEDK |
| 177         | MYENYIVPEDKREMW |
| 178         | YIVPEDKREMWMACI |
| 179         | EDKREMWMACIKELH |
| 180         | EMWMACIKELHDVSK |
| 181         | ACIKELHDVSKGAAN |
| 182         | ELHDVSKGAANKLGG |
| 183         | VSKGAANKLGGALQA |
| 184         | AANKLGGALQAKARA |
| 185         | LGGALQAKARAKKDE |
| 186         | LQAKARAKKDELRRK |
| 187         | ARAKKDELRRKMMYM |
| 188         | KDELRRKMMYMCYRN |

|     |                  |
|-----|------------------|
| 189 | RRKMMYMCYRNIEFF  |
| 190 | MYMCYRNIEFFTKNS  |
| 191 | YRNIEFFTKNSAFPK  |
| 192 | EFFTKNSAFPKTTNG  |
| 193 | KNSAFPKTTNGCSQA  |
| 194 | FPKTTNGCSQAMAAL  |
| 195 | TNGCSQAMAALQNLP  |
| 196 | SQAMAALQNLPQCSP  |
| 197 | AALQNLPQCSPDEIM  |
| 198 | NLPQCSPDEIMAYAQ  |
| 199 | CSPDEIMAYAKIFK   |
| 200 | EIMAYAKIFKILDE   |
| 201 | YAKIFKILDEERDK   |
| 202 | IFKILDEERDKVLTH  |
| 203 | LDEERDKVLTHIDHI  |
| 204 | RDKVLTHIDHIFMDI  |
| 205 | LTHIDHIFMDILTTT  |
| 206 | DHIFMDILTTTCTVM  |
| 207 | MDILTTTCTVMCNEY  |
| 208 | TTCTVMCNEYKVT    |
| 209 | ETMCNEYKVTSDACM  |
| 210 | NEYKVTSDACMMTMY  |
| 211 | VTSDACMMTMYGGIS  |
| 212 | ACMMTMYGGISLLSE  |
| 213 | TMYGGISLLSEFCRV  |
| 214 | GISLLSEFCRVLCY   |
| 215 | LSEFCRVLCYVLEE   |
| 216 | CRVLCYVLEETSVM   |
| 217 | CCYVLEETSVM LAKR |
| 218 | LEETSVM LAKRPLIT |
| 219 | SVMLAKRPLITKPEV  |
| 220 | AKRPLITKPEVISVM  |
| 221 | LITKPEVISVMKRRI  |
| 222 | PEVISVMKRRIEIEIC |
| 223 | SVMKRRIEIEICMKVF |
| 224 | RRIEIEICMKVFAQYI |
| 225 | EICMKVFAQYILGAD  |
| 226 | KVFAQYILGADPLRV  |
| 227 | QYILGADPLRVCSPS  |
| 228 | GADPLRVCSPSVDDL  |
| 229 | LRVCSPSVDDLRAIA  |
| 230 | SPSVDDLRAIAEESD  |
| 231 | DDLRAIAEESDEEEA  |
| 232 | AIAEESDEEEAIVAY  |
| 233 | ESDEEEAIVAYTLAT  |
| 234 | EEAIVAYTLATAGVS  |
| 235 | VAYTLATAGVSSSDS  |
| 236 | LATAGVSSSDSLVSP  |
| 237 | GVSSSDSLVSPESP   |
| 238 | SDSLVSPESPVPAT   |

|     |                  |
|-----|------------------|
| 239 | VSPPEPVPATIPLS   |
| 240 | ESPVPATIPLSVIV   |
| 241 | PATIPLSVIVAENS   |
| 242 | PLSSVIVAENS DQEE |
| 243 | VIVAENS DQEESEQS |
| 244 | ENS DQEESEQSDEEE |
| 245 | QEESEQSDEEEEGA   |
| 246 | EQSDEEEEGAQEER   |
| 247 | EEEEEGAQEEREDTV  |
| 248 | EGAQEEREDTVSVKS  |
| 249 | EEREDTVSVKSEPV   |
| 250 | DTVSVKSEPVSEIEE  |
| 251 | VKSEPVSEIEEVAPE  |
| 252 | PVSEIEEVAPEEEED  |
| 253 | IEEVAPEEEEDGAE   |
| 254 | APEEEEDGAEEPTAS  |
| 255 | EEDGAEEPTASGGKS  |
| 256 | AEEPTASGGKSTHPM  |
| 257 | TASGGKSTHPM VTRS |
| 258 | GKSTHPM VTRSKADQ |

## C) IE2

| Peptide No. | Sequence        |
|-------------|-----------------|
| 259         | MESSAKRKMDPDNPD |
| 260         | AKRKMDPDNPDEGPS |
| 261         | MDPDNPDEGPSSKVP |
| 262         | NPDEGPSSKVPRPET |
| 263         | GPSSKVPRPETPVTK |
| 264         | KVPRPETPVTKATTF |
| 265         | PETPVTKATTFLQTM |
| 266         | VTKATTFLQTMLRKE |
| 267         | TTFLQTMLRKEVNSQ |
| 268         | QTMLRKEVNSQLSLG |
| 269         | RKEVNSQLSLGDPLF |
| 270         | NSQLSLGDPLFPELA |
| 271         | SLGDPLFPELAEESL |
| 272         | PLFPELAEESLKTFE |
| 273         | ELAEESLKTFEQVTE |
| 274         | ESLKTFEQVTEDCNE |
| 275         | TFEQVTEDCNENPEK |
| 276         | VTEDCNENPEKDVLA |
| 277         | CNENPEKDVLAELGD |
| 278         | PEKDVLAELGDILAQ |
| 279         | VLAELGDILAQAVNH |
| 280         | LGDILAQAVNHAGID |
| 281         | LAQAVNHAGIDSSST |
| 282         | VNHAGIDSSSTGPTL |
| 283         | GIDSSSTGPTLTTHS |
| 284         | SSTGPTLTTHSCSVS |
| 285         | PTLTTHSCSVSSAPL |
| 286         | THSCSVSSAPLNKPT |
| 287         | SVSSAPLNKPTPTSV |
| 288         | APLNKPTPTSVAVTN |
| 289         | KPTPTSVAVTNTPLP |
| 290         | TSVAVTNTPLPGASA |
| 291         | VTNTPLPGASATPEL |
| 292         | PLPGASATPELSPRK |
| 293         | ASATPELSPRKPRK  |
| 294         | PELSPRKPRKTTRP  |
| 295         | PRKKPRKTTRPFKVI |
| 296         | PRKTTRPFKVIKPP  |
| 297         | TRPFKVIKPPVPPA  |
| 298         | KVIKPPVPPAPIML  |
| 299         | KPPVPPAPIMLPLIK |
| 300         | PPAPIMLPLIKQEDI |
| 301         | IMLPLIKQEDIKPEP |
| 302         | LIKQEDIKPEPDFTI |
| 303         | EDIKPEPDFTIQYRN |
| 304         | PEPDFTIQYRNKIID |
| 305         | FTIQYRNKIIDTAGC |
| 306         | YRNKIIDTAGCIVIS |
| 307         | IIDTAGCIVISDSEE |
| 308         | AGCIVISDSEEEQGE |
| 309         | VISDSEEEQGEEVET |
| 310         | SEEEQGEEVETRGAT |
| 311         | QGEEVETRGATASSP |

|     |                   |
|-----|-------------------|
| 312 | VETRGATASSPSTGS   |
| 313 | GATASSPSTGSGTPR   |
| 314 | SSPSTGSGTPRVTS    |
| 315 | TGSGTPRVTSPTHPL   |
| 316 | TPRVTSPTHPLSQMN   |
| 317 | TSPTHPLSQMNHPL    |
| 318 | HPLSQMNHPLPDPL    |
| 319 | QMNHPLPDPLGRPD    |
| 320 | PPLPDPLGRPDEDSS   |
| 321 | DPLGRPDEDSSSSSS   |
| 322 | RPDEDSSSSSSSSCS   |
| 323 | DSSSSSSSSSCSSASD  |
| 324 | SSSSSSSCSSASDSESE |
| 325 | SCSSASDSESESEEM   |
| 326 | ASDSESESEEMKCSS   |
| 327 | ESESEEMKCSSGGGA   |
| 328 | EEMKCSSGGGASVTS   |
| 329 | CSSGGGASVTSSHG    |
| 330 | GGASVTSSHHGRRGF   |
| 331 | VTSSHHGRRGFGGAA   |
| 332 | HHGRRGFGGAASSSL   |
| 333 | GGFGGAASSLLSCG    |
| 334 | GAASSLLSCGHQSS    |
| 335 | SSLLSCGHQSSGGAS   |
| 336 | SCGHQSSGGASTGPR   |
| 337 | QSSGGASTGPRKKKS   |
| 338 | GASTGPRKKKSKRIS   |
| 339 | GPRKKKSKRIELDN    |
| 340 | KKSKRIELDNEKVR    |
| 341 | RIELDNEKVRNIMK    |
| 342 | LDNEKVRNIMKDKNT   |
| 343 | KVRNIMKDKNTPFCT   |
| 344 | IMKDKNTPFCTPNVQ   |
| 345 | KNTPFCTPNVQTRRG   |
| 346 | FCTPNVQTRRGVRKI   |
| 347 | NVQTRRGVRKIDEVS   |
| 348 | RRGRVKIDEVSRMFR   |
| 349 | VKIDEVSRMFRNTNR   |
| 350 | EVSRMFRNTNRSLEY   |
| 351 | MFRNTNRSLEYKNLP   |
| 352 | TNRSLEYKNLPFTIP   |
| 353 | LEYKNLPFTIPSMHQ   |
| 354 | NLPFTIPSMHQVLDE   |
| 355 | TIPSMHQVLDEAIKA   |
| 356 | MHQVLDEAIKACKTM   |
| 357 | LDEAIKACKTMQVNN   |
| 358 | IKACKTMQVNNKGIQ   |
| 359 | KTMQVNNKGIQIYT    |
| 360 | VNNKGIQIYTRNHE    |
| 361 | GIQIYTRNHEVKSE    |
| 362 | IYTRNHEVKSEVDAV   |
| 363 | NHEVKSEVDAVRCRL   |
| 364 | KSEVDAVRCRLGTM    |

|     |                  |
|-----|------------------|
| 365 | DAVRCRLGTMCNLAL  |
| 366 | CRLGTMCNLALSTPF  |
| 367 | TMCNLALSTPFLMEH  |
| 368 | LALSTPFLMEHTMPV  |
| 369 | TPFLMEHTMPVTHPP  |
| 370 | MEHTMPVTHPPVDAQ  |
| 371 | MPVTHPPVDAQRTAD  |
| 372 | HPPEVAQRTADACNE  |
| 373 | VAQRTADACNEGVKA  |
| 374 | TADACNEGVKAAWSL  |
| 375 | CNEGVKAAWSLKEHL  |
| 376 | VKAAWSLKEHLTHQL  |
| 377 | WSLKEHLTHQLCPRS  |
| 378 | ELHQLCPRSSDYR    |
| 379 | HQLCPRSSDYRNMI   |
| 380 | PRSSDYRNMIHAAT   |
| 381 | DYRNMIHAATPVDL   |
| 382 | MIHAATPVDLLGAL   |
| 383 | AATPVDLLGALNLCL  |
| 384 | VDLLGALNLCLPLMQ  |
| 385 | GALNLCLPLMQKFPK  |
| 386 | LCLPLMQKFPKQVMV  |
| 387 | LMQKFPKQVMVRIFS  |
| 388 | FPKQVMVRIFSTNQG  |
| 389 | VMVRIFSTNQGGMFL  |
| 390 | IFSTNQGGMFLPIYE  |
| 391 | NQGMFLPIYETAALK  |
| 392 | FMLPIYETAALKAYAV |
| 393 | IYETAALKAYAVGQFE |
| 394 | AAKAYAVGQFEQPT   |
| 395 | YAVGQFEQPTETPPE  |
| 396 | QFEQPTETPPEDLDT  |
| 397 | PTETPPEDLDTLSLA  |
| 398 | PPEDLDTLSLAIEAA  |
| 399 | LDLTLAIEAAIQDL   |
| 400 | SLAIEAAIQDLRNKS  |
| 401 | LAIEAAIQDLRNKSQ  |
